# Supplementary material for: BiT age: A transcriptome‐based aging clock near the theoretical limit of accuracy
Source: PubMed Central journal article supplement (PMC7963339; doi:10.1111/acel.13320), 2021-03-03

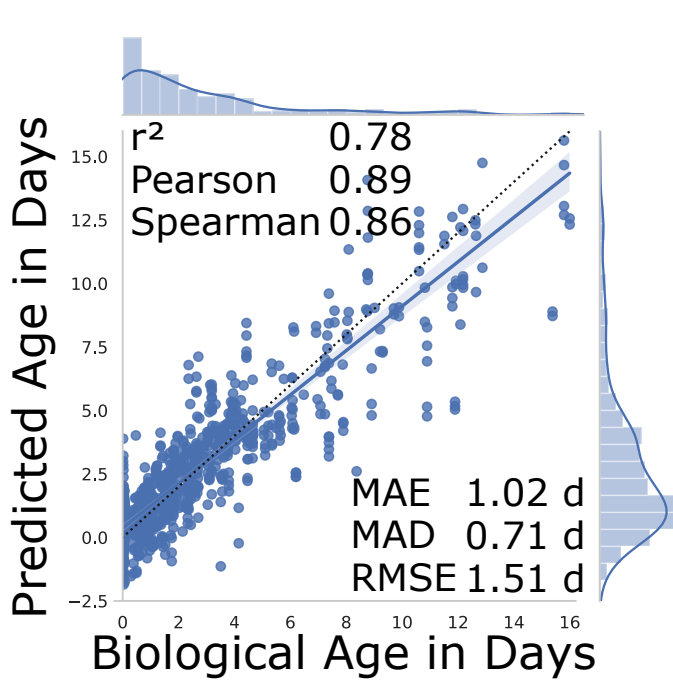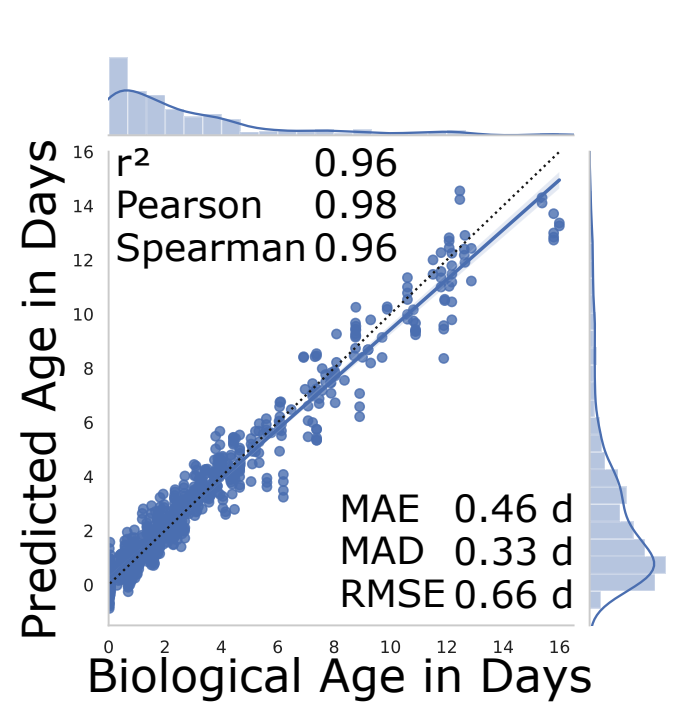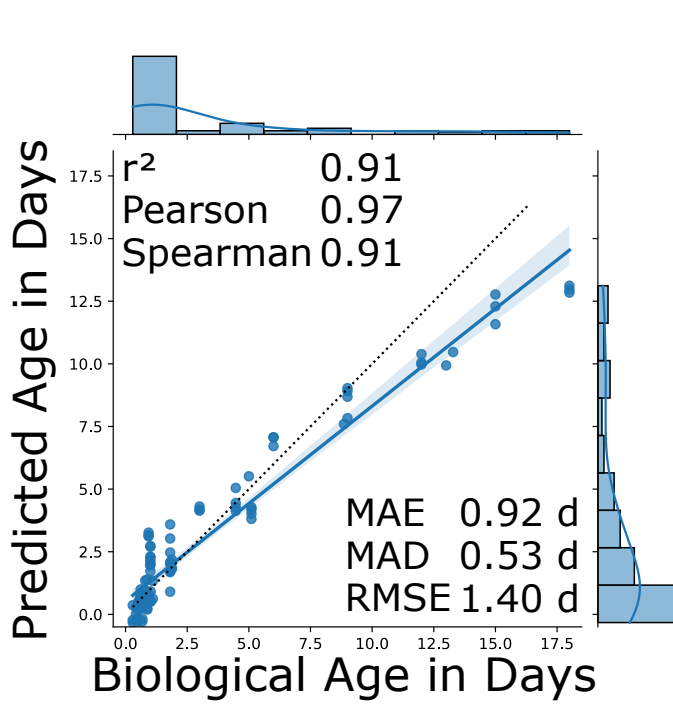

**Fig. S1**

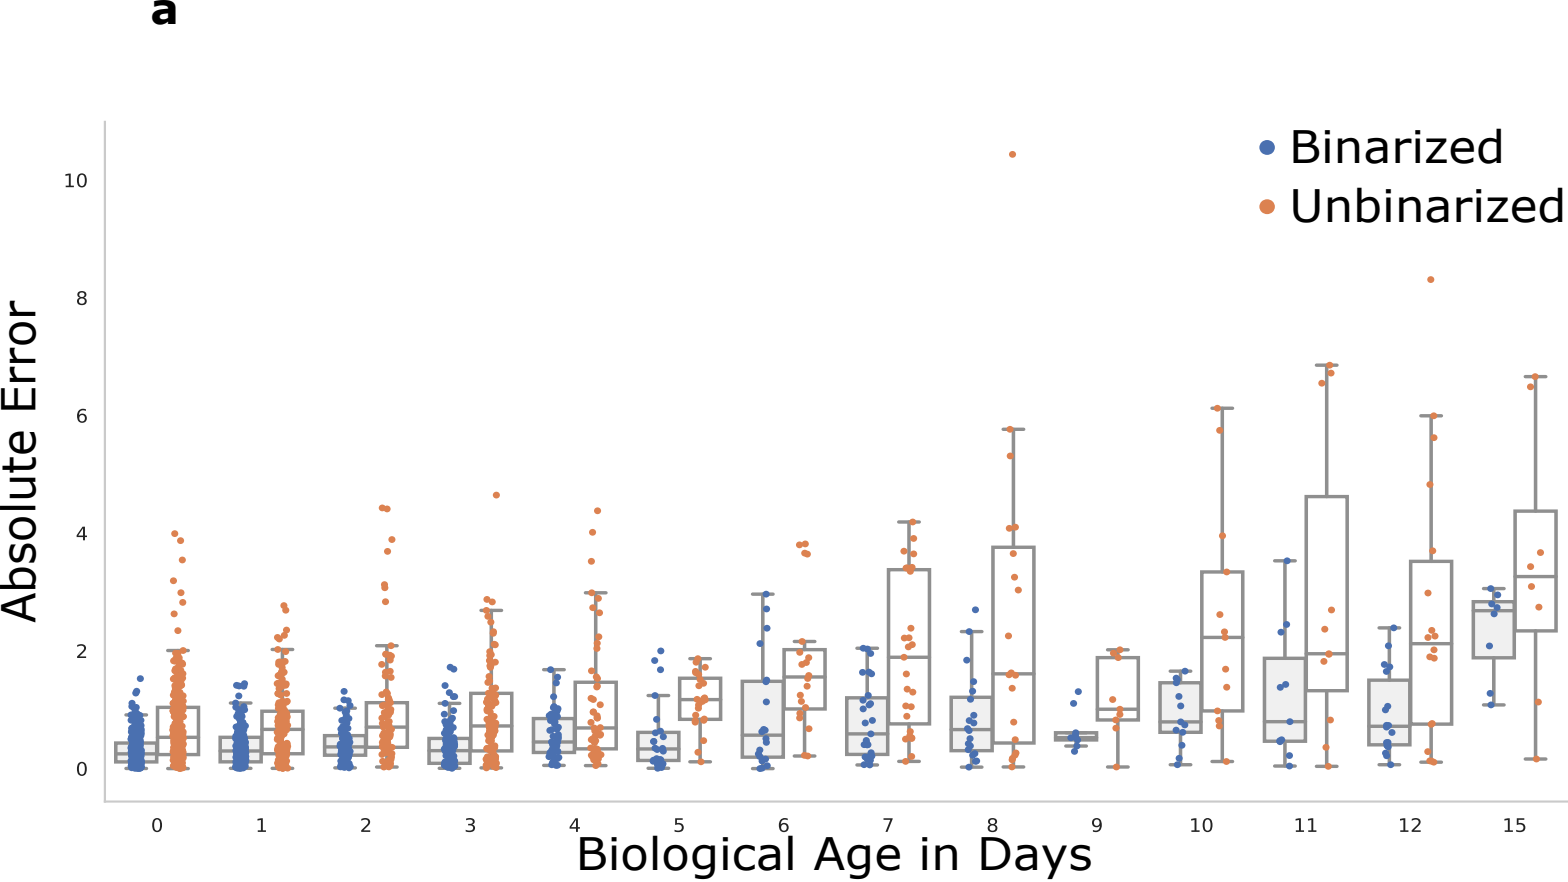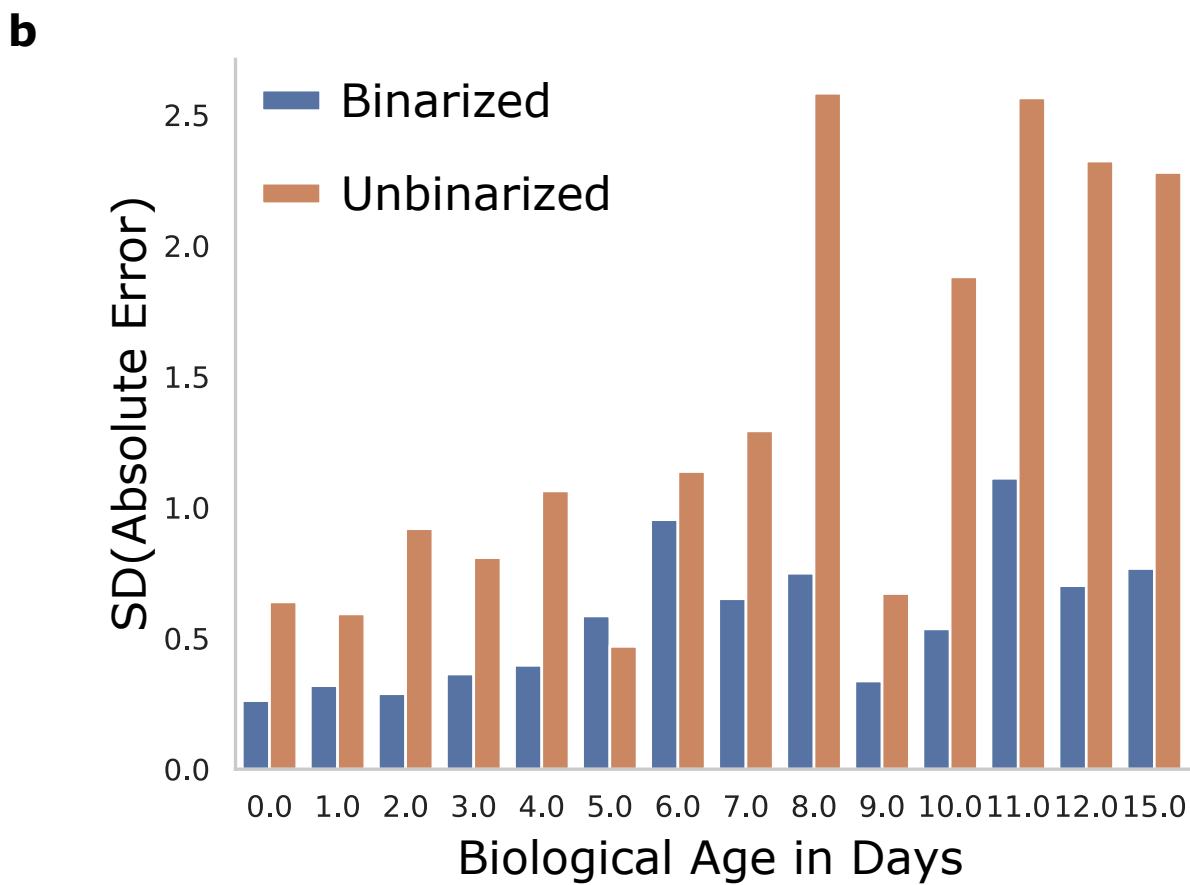

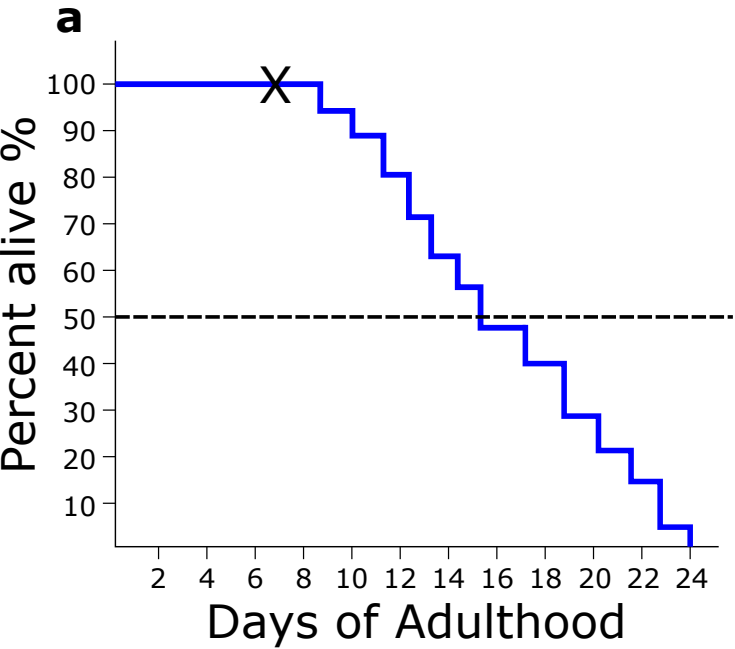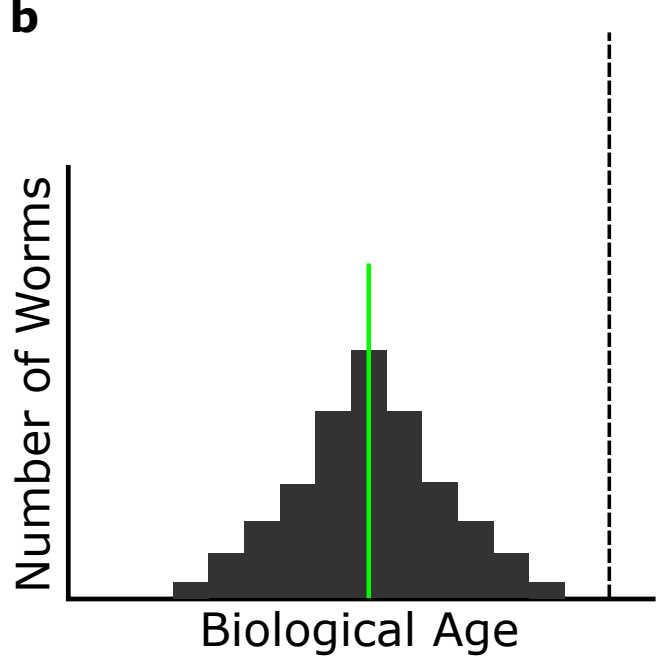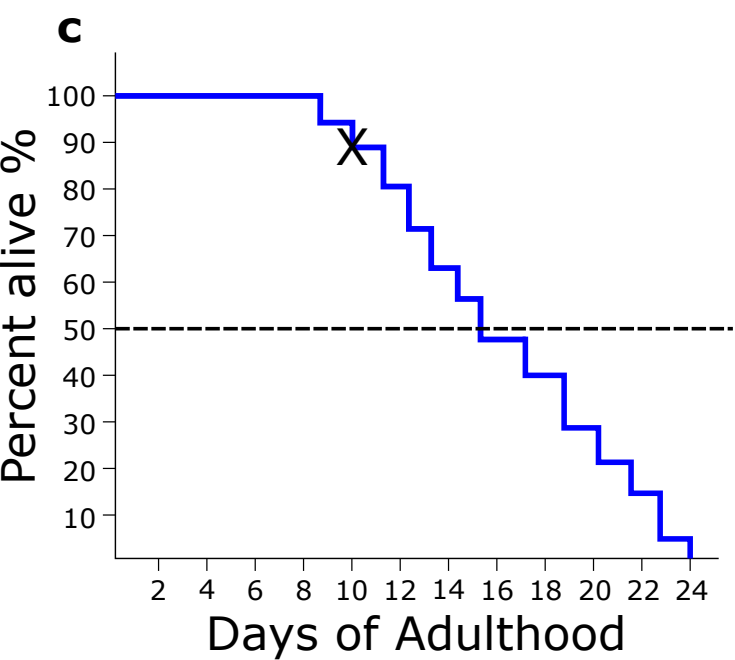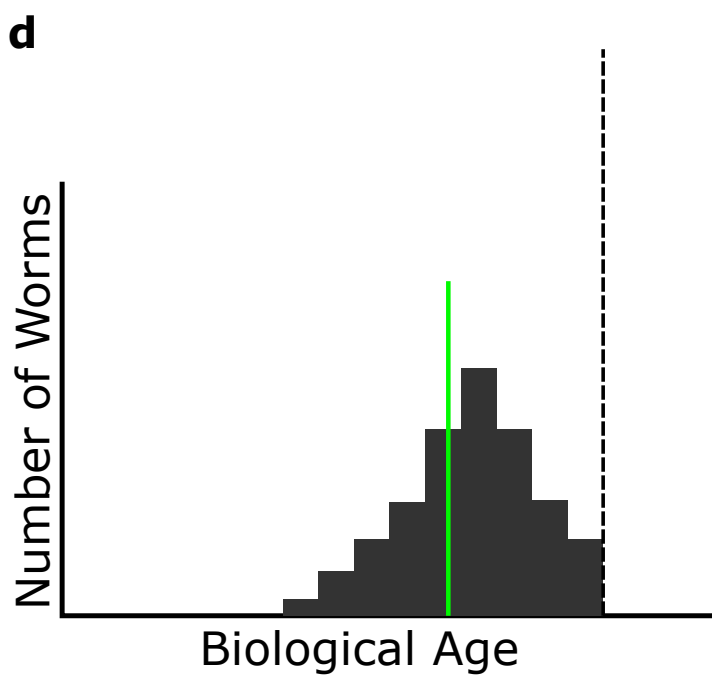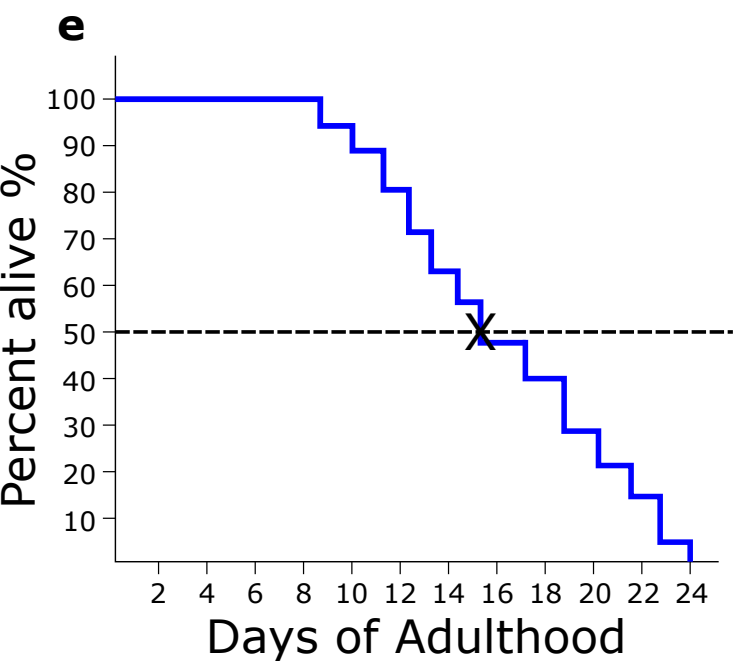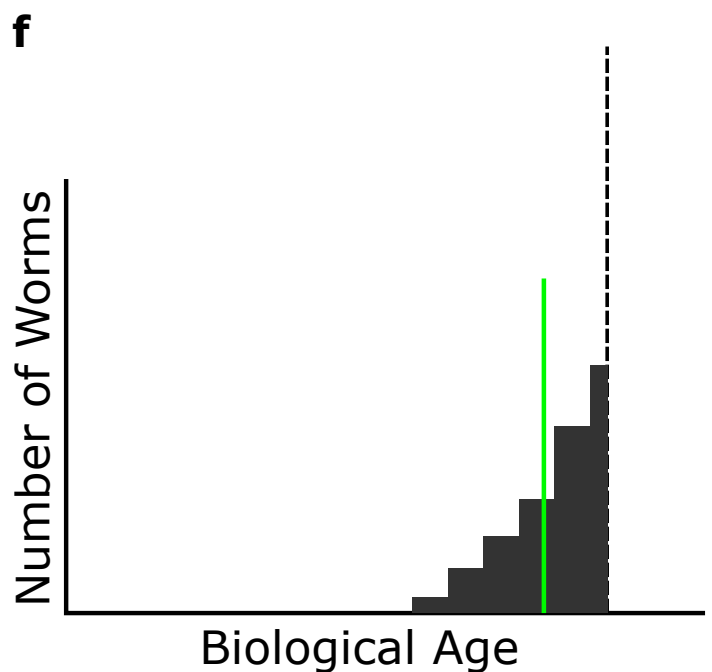

**Fig. S3**

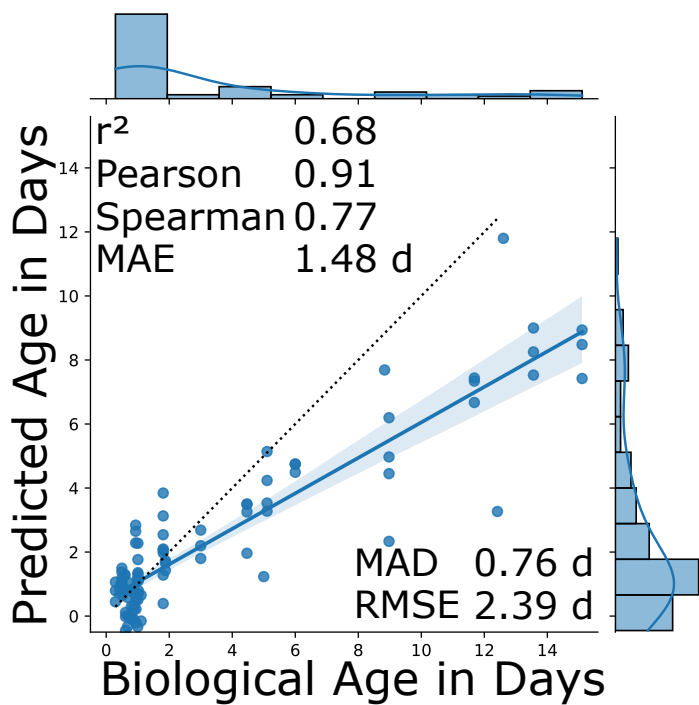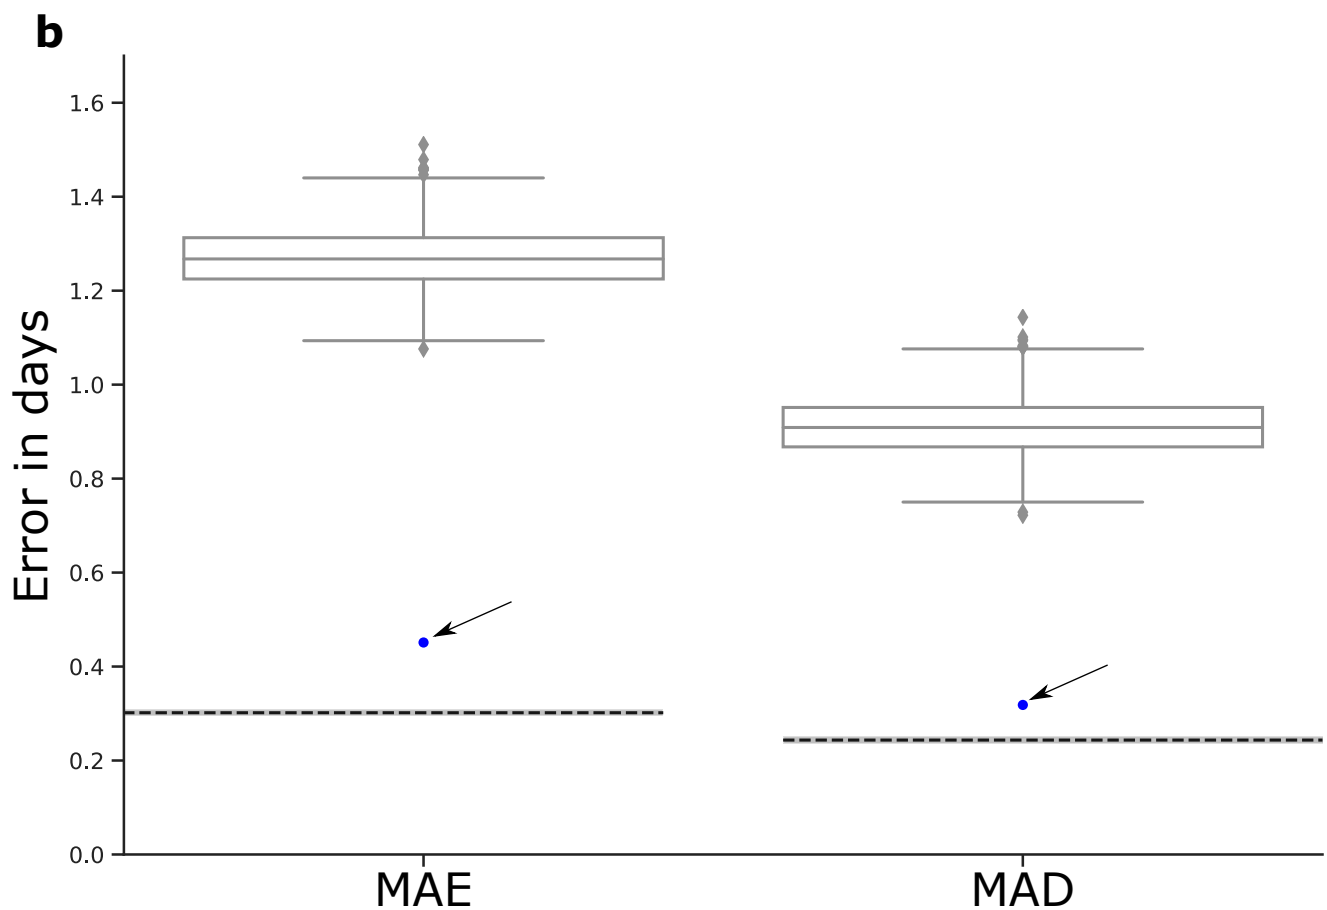

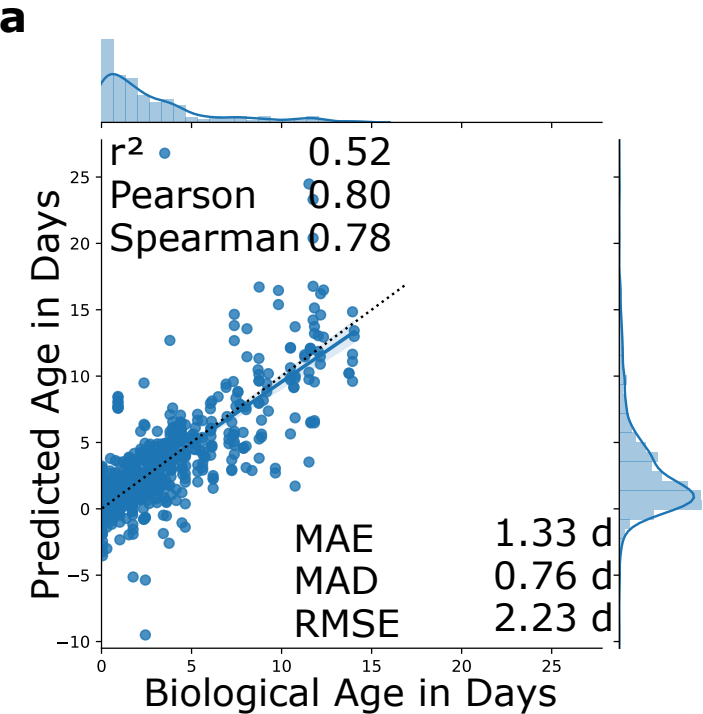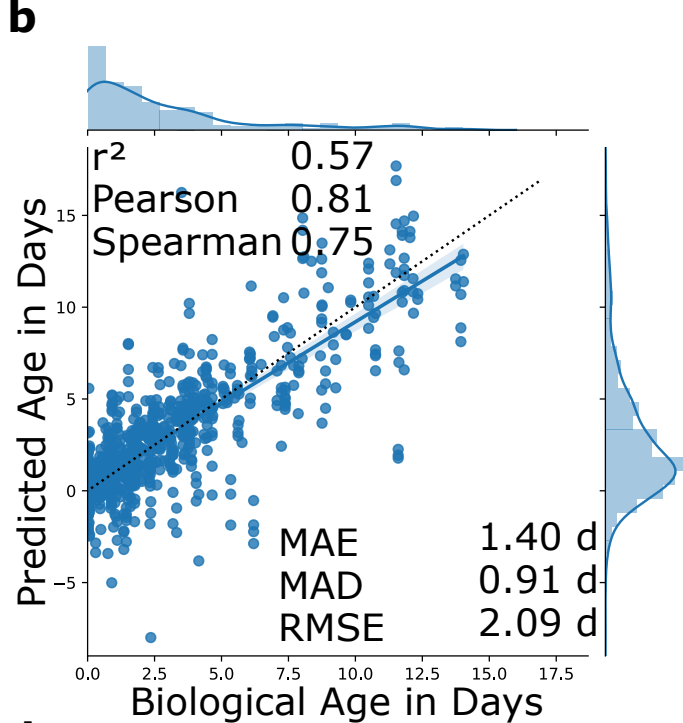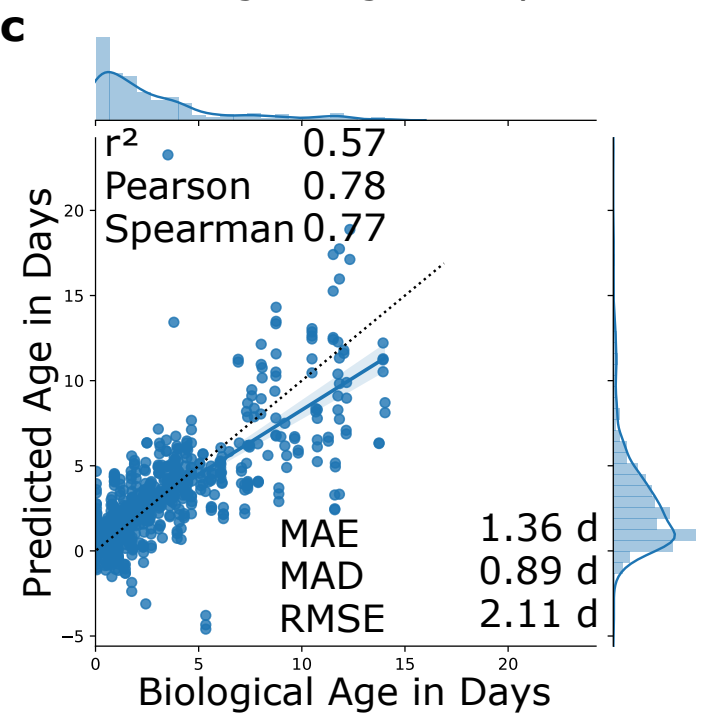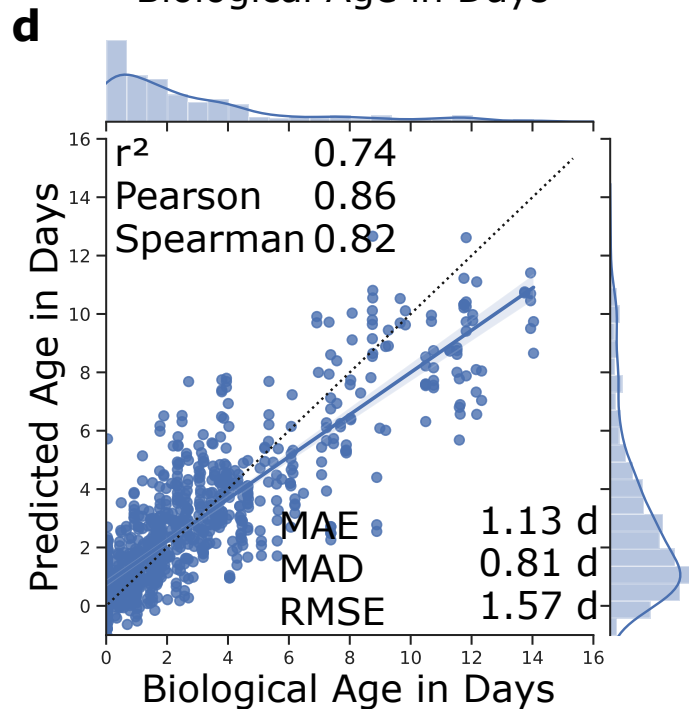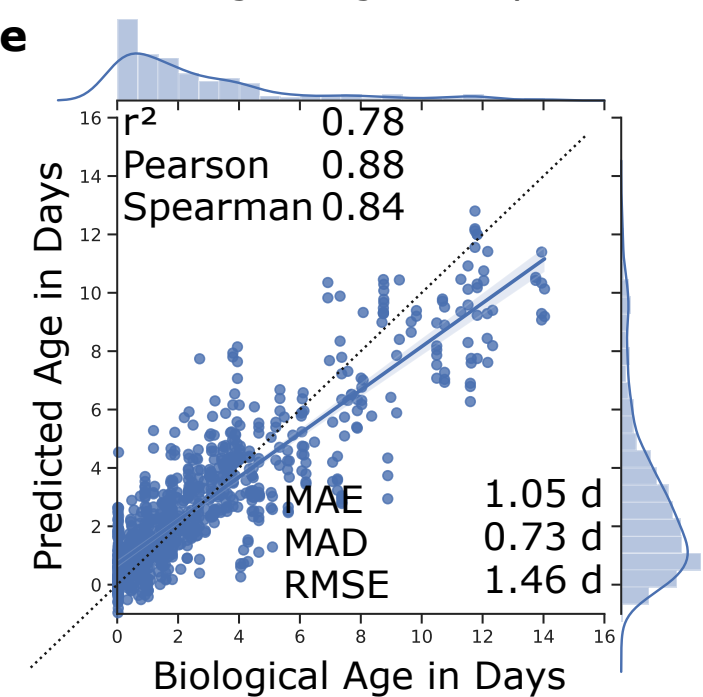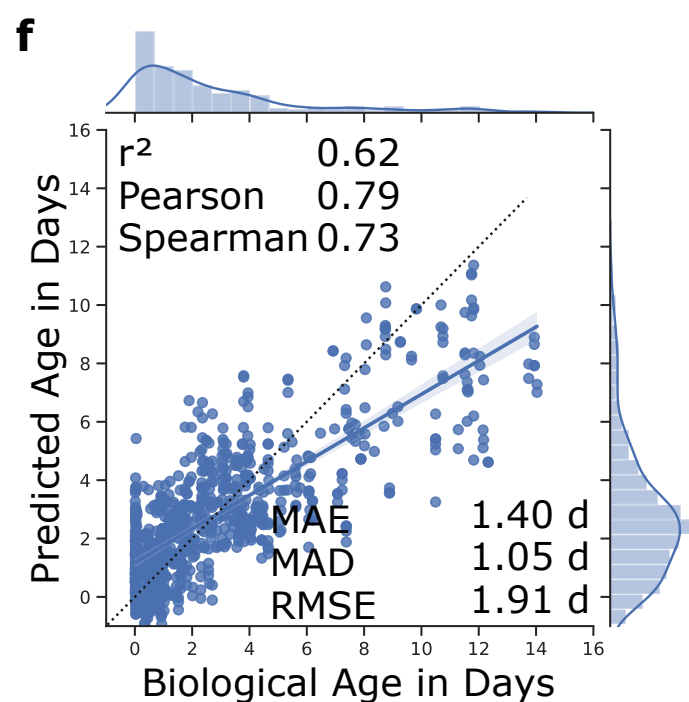

**Fig. S5**

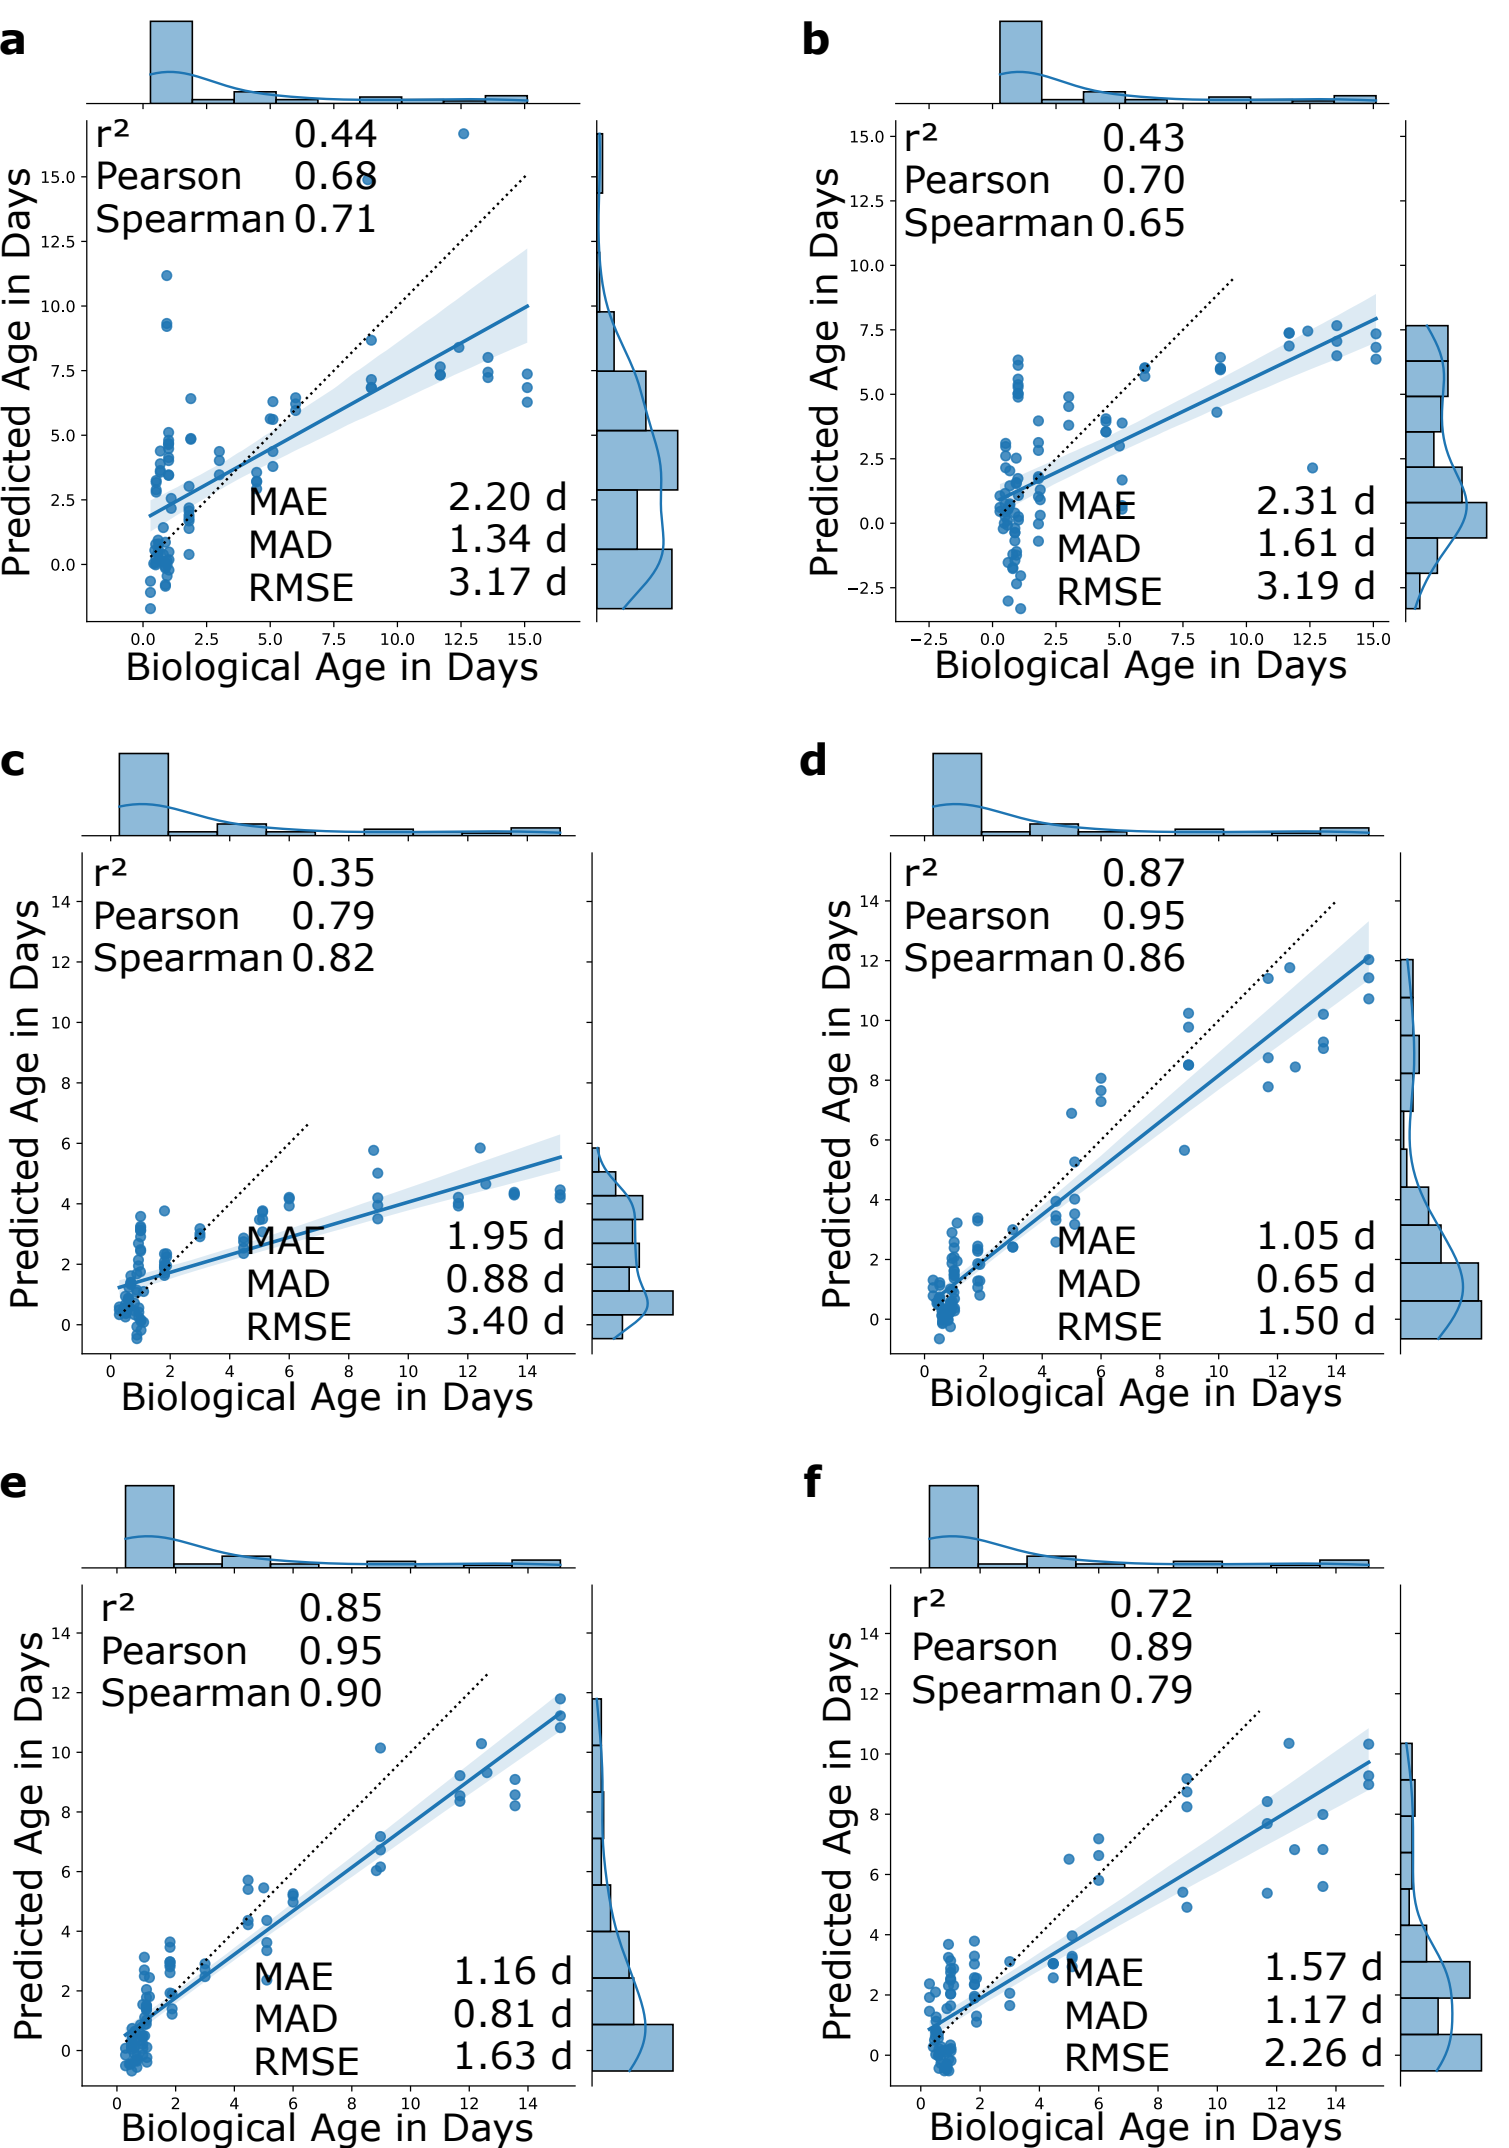

**Fig. S6**

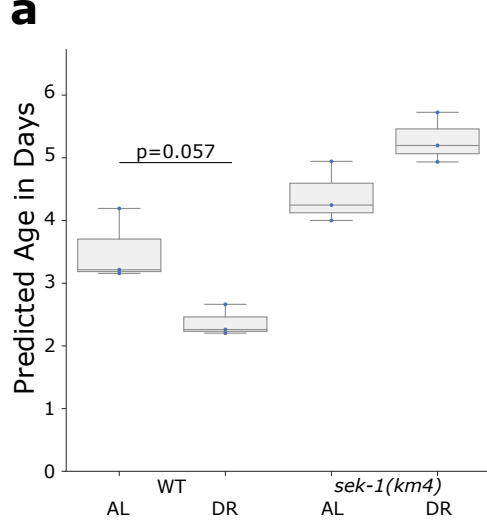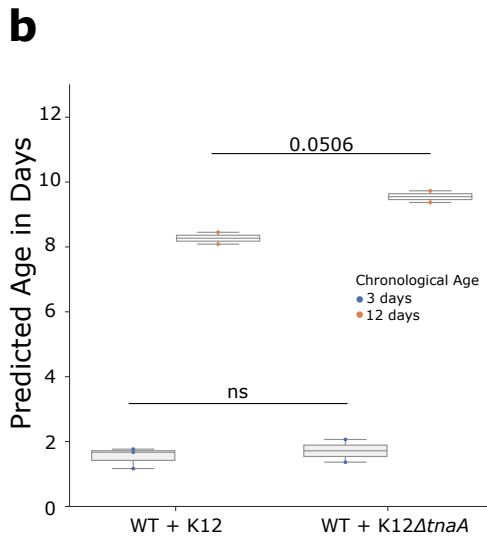

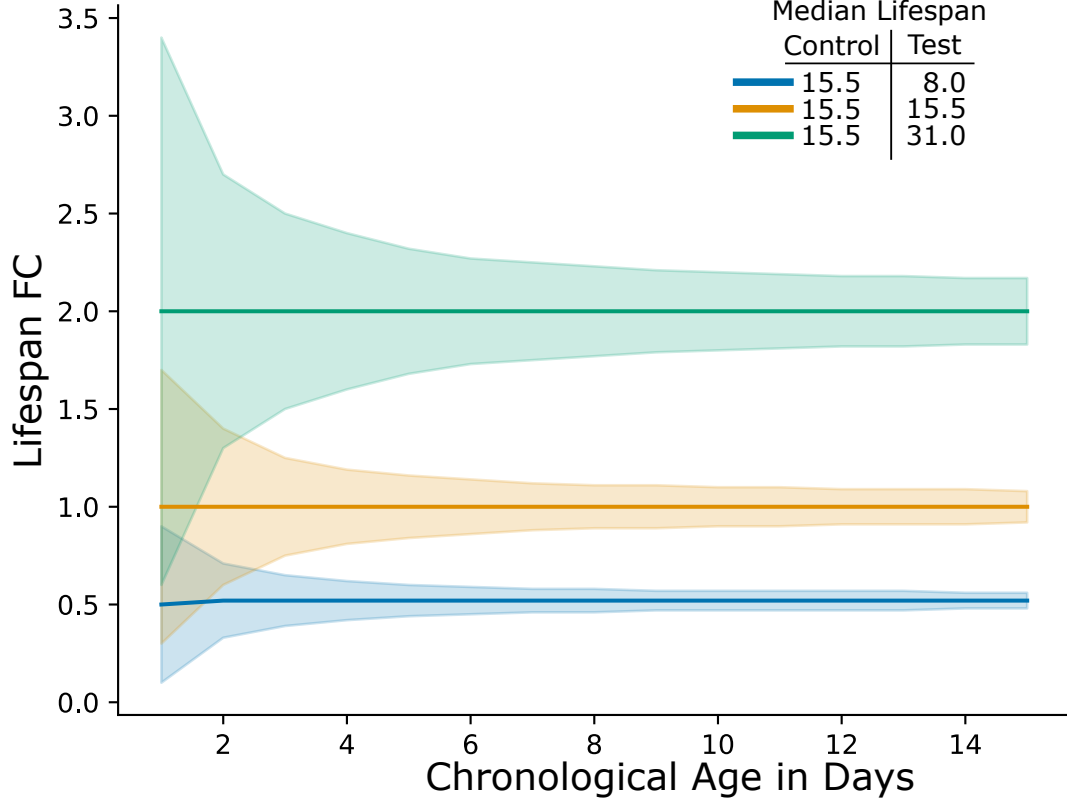



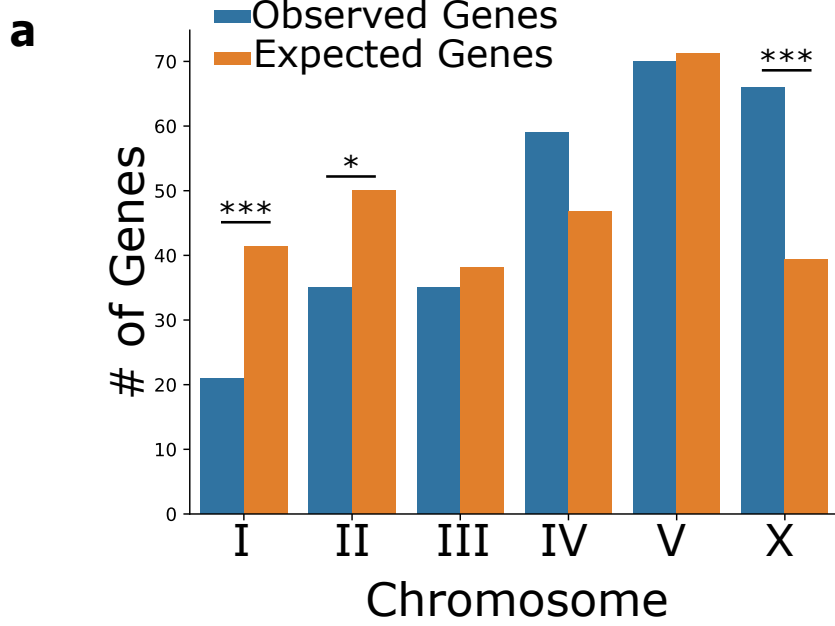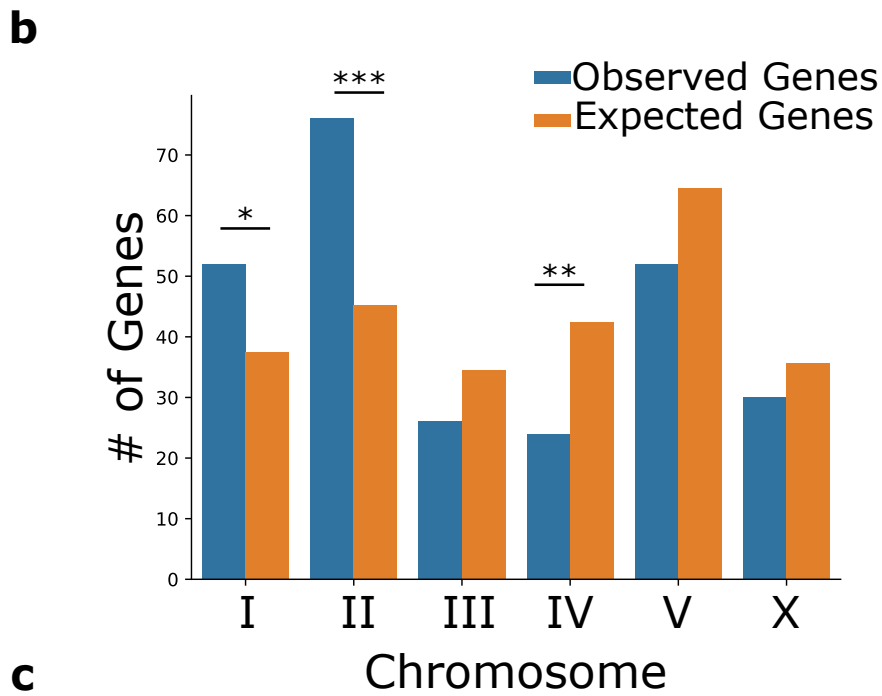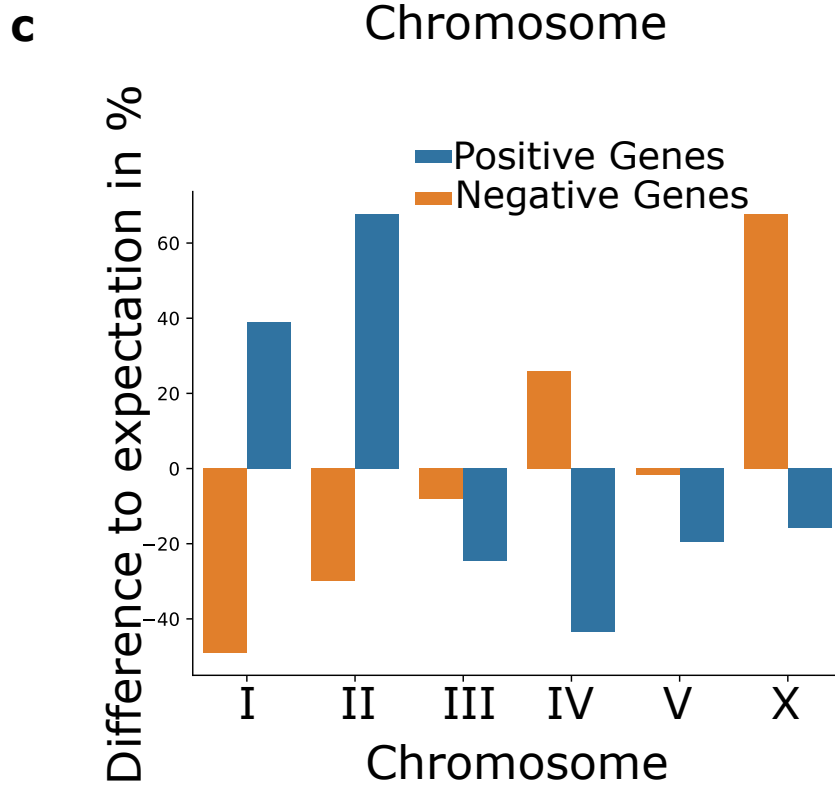

**a**

| Name        | Motif                                                                             | % of Genes | % of BG | FC   | p-value  | q-value  |
|-------------|-----------------------------------------------------------------------------------|------------|---------|------|----------|----------|
| PQM-1(Gata) |   | 29.93      | 17.10   | 1.75 | 1.09E-07 | 1.2E-06  |
| ELT-3(Gata) |  | 31.02      | 20.59   | 1.51 | 3.00E-05 | 1.65E-04 |

**b**

| Name        | Motif                                                                             | % of Genes | % of BG | FC   | p-value  | q-value  |
|-------------|-----------------------------------------------------------------------------------|------------|---------|------|----------|----------|
| ELT-3(Gata) |  | 30.04      | 19.91   | 1.51 | 7.74E-05 | 8.51E-04 |
| PQM-1(Gata) |  | 23.72      | 16.52   | 1.44 | 1.97E-03 | 0.01     |

**a**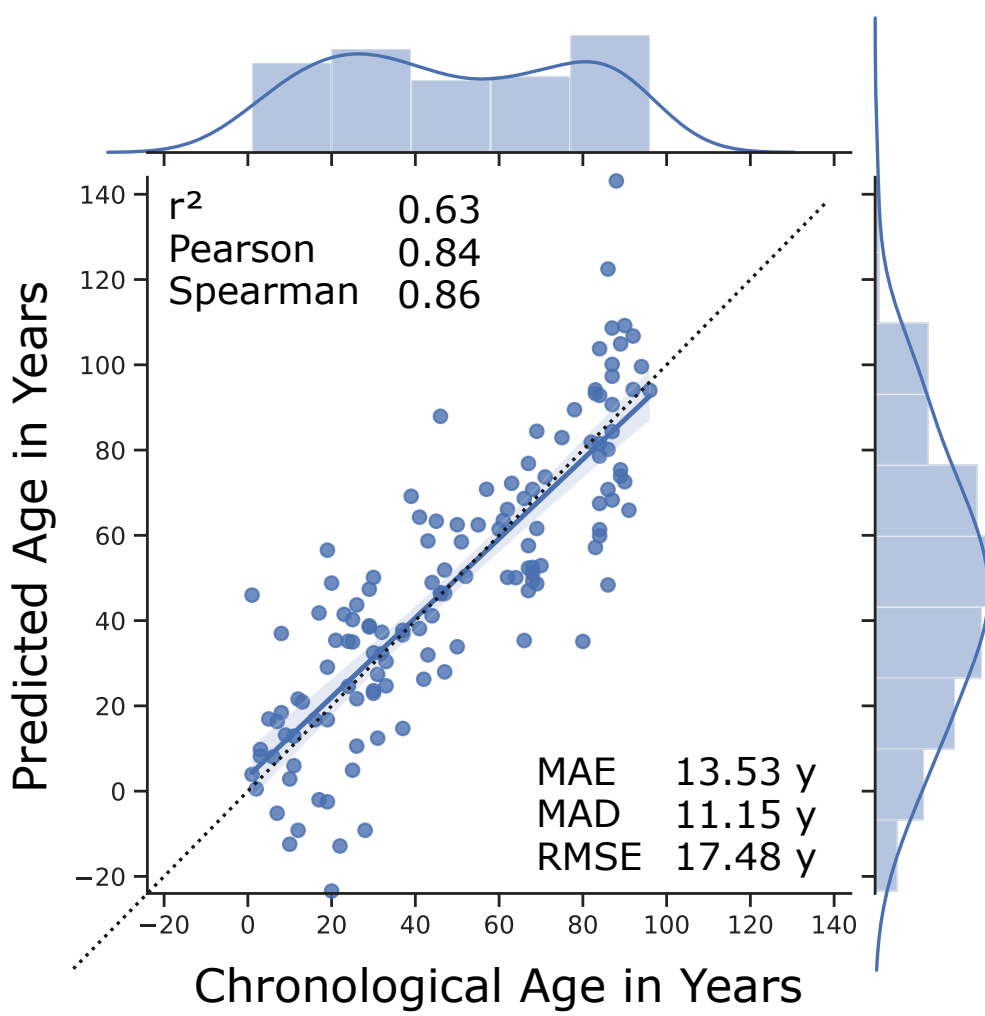**b**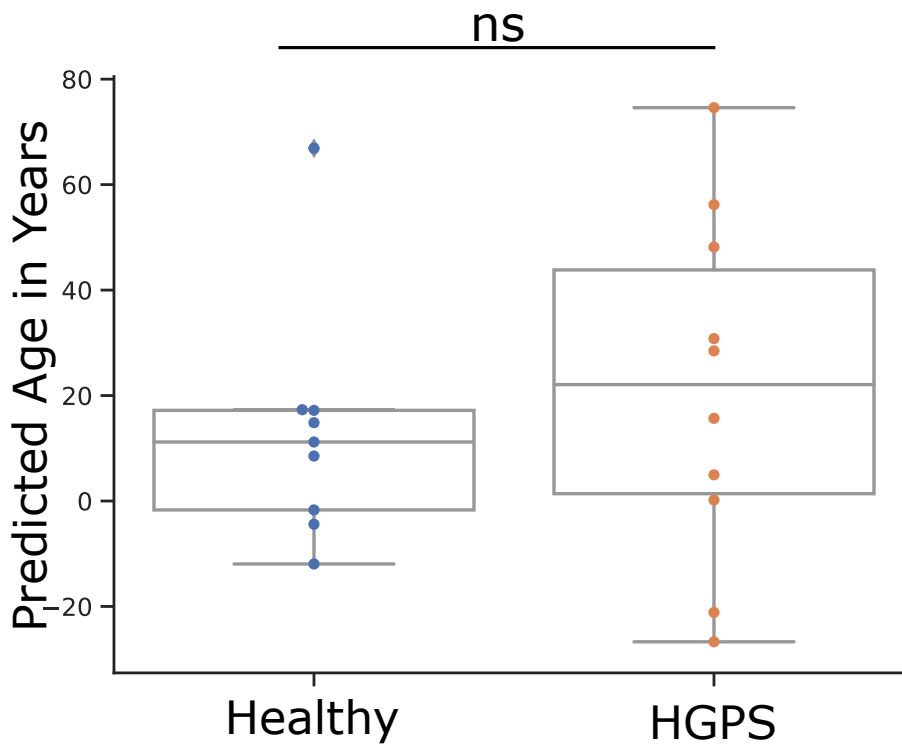

Supplement: ACEL-20-e13320-s008.pdf [file ACEL-20-e13320-s008.pdf]
